# Supplementary material
Source: publisher figshare collection journal article supplement (https://tandf.figshare.com/articles/dataset/_/15090717)
Supplement: Supplementary file 1 [file 1]

Supplementary Table 2.Cost distribution in patients with different subtypes of DED

|  |  | EDE ($) | ADDE ($) | Mixed DED ($) | *P* value |
| --- | --- | --- | --- | --- | --- |
| Case |  | 57 | 20 | 144 |  |
| DED related examination | Mean ± SD | 57.35 ± 24.51 | 50.17 ± 22.45 | 52.87 ± 28.35 | 0.116a |
| Range | 28.71–149.61 | 28.71–98.23 | 28.71-179.84 |
| Basic examination | Mean ± SD | 14.13 ± 10.00 | 18.91 ± 14.73 | 13.96 ± 10.20 | 0.205a |
| Range | 6.50–62.87 | 6.50–68.91 | 6.50–71.18 |
| Artificial tears eye drops | Mean ± SD | 27.66 ± 31.03 | 31.12 ± 33.01 | 32.03 ± 28.54 | 0.440a |
| Range | 0.00–163.68 | 6.42–151.44 | 0.00–147.08 |
| Anti–inflammatory eye drops | Mean ± SD | 1.21 ± 3.02c | 66.98 ± 62.42 | 3.03 ± 9.92c | <0.001ab |
| Range | 0.00–14.95 | 0.00–232.81 | 0.00–100.11 |
| Other eye drops | Mean ± SD | 15.86 ± 28.23 | 18.57 ± 20.19 | 16.34 ± 20.14 | 0.355a |
| Range | 0.00–164.51 | 0.00–75.10 | 0.00–127.34 |
| Physiotherapy | Mean ± SD | 345.08 ± 266.81c | 137.06 ± 189.65 | 333.87 ± 269.78c | 0.003ab |
| Range | 0.00–997.43 | 0.00–544.05 | 0.00–1265.68 |
| Products | Mean ± SD | 32.32 ± 64.42 | 52.48 ± 82.36 | 14.86 ± 46.23 | 0.003ab |
| Range | 0.00–265.98 | 0.00–235.76 | 0.00–269.00 |
| Total | Mean ± SD | 493.61 ± 311.57 | 375.30 ± 254.03 | 466.96 ± 305.40 | 0.424a |
| Range | 59.43–1282.68 | 83.27–935.02 | 56.16–1708.07 |

DED = dry eye disease

EDE = evaporative dry eye

ADDE = aqueous deficiency dry eye

aKruskal–Wallis test

b*P*<0.05

cCompared with ADDE cases, *P*<0.0167 (Bonferroni correction
